# Supplementary material for: Agreement between questions about physical activity and sitting time, and device-based measures, used in Swedish targeted health dialogues in the context of primary health care
Source: BMC Sports Sci Med Rehabil. 2023 Jul 4;15:76. doi: 10.1186/s13102-023-00690-8 (PMC10318802; doi:10.1186/s13102-023-00690-8)
Supplement: Supplementary file 1 — Supplementary Material 1 [file 13102_2023_690_MOESM1_ESM.pdf]

© Department of Research and Development, Futurum, Jonköping
